# Supplementary material
Source: publisher figshare collection journal article supplement (https://gsajournals.figshare.com/ndownloader/files/26073884)
Supplement: Supplementary file 1 [file 26073884]

idcode	mother	father
35	0	0
36	0	0
37	0	0
38	0	0
39	0	0
40	0	0
41	0	0
42	0	0
43	0	0
44	0	0
45	0	0
46	0	0
47	0	0
48	0	0
50	0	0
51	0	0
2	0	0
3	0	0
4	0	0
5	0	0
6	0	0
7	5	46
8	3	48
9	6	47
10	0	0
11	35	50
12	44	0
13	36	35
14	0	0
15	0	0
17	41	3
18	45	51
19	5	0
20	40	0
21	15	42
22	5	39
23	37	41
24	0	0
25	0	0
26	0	0
27	4	43
28	0	0
29	0	0
V1	21	6
V2	21	6
V3	21	6
V4	21	6
V5	21	6
V6	21	5
V7	21	5
V8	21	5
V9	21	5
V10	21	5
V11	21	5
V12	21	5
V13	21	5
V14	21	5
V15	21	5
V16	21	5
V17	21	5
V18	12	6
V19	12	6
V20	22	6
V21	22	6
V22	23	26
V23	23	26
V24	23	26
V25	23	26
V26	24	26
V27	24	26
V28	24	26
V29	24	26
V30	24	26
V31	24	26
V32	24	26
V33	24	26
V34	24	26
V35	24	26
V36	24	26
V37	24	26
V38	24	26
V39	24	26
V40	24	26
V41	24	26
V42	24	26
V43	24	26
V44	24	26
V45	24	26
V46	24	26
V47	24	26
V48	24	26
V49	24	26
V50	24	26
V51	24	26
V52	24	26
V53	24	26
V54	24	26
V55	24	26
V56	24	26
V57	24	26
V58	24	26
V59	24	26
V60	24	26
V61	24	26
V62	24	26
V63	24	26
V64	24	26
V65	24	26
V66	24	26
V67	24	5
V68	24	5
V69	24	5
V70	24	5
V71	24	5
V72	24	5
V73	24	5
V74	24	5
V75	5	26
V76	5	26
V77	5	26
V78	5	26
V79	5	26
V80	5	26
V81	5	26
V82	5	26
V83	5	26
V84	5	26
V85	5	26
V86	5	26
V87	5	26
V88	5	26
V89	5	26
V90	5	26
V91	5	26
V92	5	26
V93	5	26
V94	5	26
V95	5	26
V96	5	26
V97	5	26
V98	5	26
V99	5	26
V100	5	26
V101	5	26
V102	5	26
V103	5	26
V104	5	26
V105	5	26
V106	5	26
V107	5	26
V108	5	26
V109	5	26
V110	5	26
V111	5	26
V112	5	26
V113	5	26
V114	5	26
V115	5	26
V116	5	26
V117	5	26
V118	5	26
V119	5	26
V120	5	26
V121	5	26
V122	5	26
V123	5	26
V124	5	26
V125	5	26
V126	5	26
V127	5	26
V128	5	26
V129	5	26
V130	5	26
V131	5	26
V132	5	26
V133	5	26
V134	5	26
V135	5	26
V136	5	26
V137	5	26
V138	5	26
V139	5	26
V140	5	26
V141	5	26
V142	5	26
V143	5	26
V144	5	26
V145	5	26
V146	26	28
V147	26	28
V148	26	28
V149	26	28
V150	26	28
V151	26	28
V152	26	28
V153	26	28
V154	26	28
V155	26	28
V156	26	28
V157	26	28
V158	26	28
V159	26	28
V160	26	28
V161	26	28
V162	26	28
V163	26	28
V164	26	28
V165	26	28
V166	26	28
V167	26	28
V168	26	28
V169	26	28
V170	26	28
V171	26	28
V172	26	28
V173	26	28
V174	26	28
V175	26	28
V176	26	28
V177	26	28
V178	26	28
V179	26	28
V180	26	28
V181	26	28
V182	26	28
V183	26	28
V184	26	28
V185	26	28
V186	26	28
V187	26	28
V188	26	28
V189	26	28
V190	26	28
V191	26	28
V192	26	28
V193	26	28
V194	26	28
V195	26	28
V196	26	28
V197	26	28
V198	26	28
V199	26	28
V200	26	28
V201	26	28
V202	26	28
V203	26	28
V204	26	28
V205	26	28
V206	26	28
V207	26	28
V208	26	28
V209	26	28
V210	26	28
V211	26	28
V212	26	28
V213	26	28
V214	26	28
V215	26	28
V216	26	28
V217	26	28
V218	26	28
V219	26	28
V220	26	28
V221	26	28
V222	26	28
V223	26	28
V224	26	28
V225	26	28
V226	26	28
V227	26	28
V228	26	28
V229	26	28
V230	26	28
V231	26	28
V232	26	28
V233	26	28
V234	26	28
V235	26	28
V236	26	28
V237	26	28
V238	26	28
V239	26	28
V240	26	28
V241	26	28
V242	26	28
V243	26	28
V244	26	28
V245	26	28
V246	26	28
V247	26	28
V248	26	28
V249	26	28
V250	26	28
V251	26	28
V252	26	28
V253	26	28
V254	26	28
V255	26	28
V256	26	28
V257	26	28
V258	26	28
V259	26	28
V260	26	28
V261	26	28
V262	26	28
V263	26	28
V264	26	28
V265	26	28
V266	26	28
V267	26	28
V268	26	28
V269	26	28
V270	26	28
V271	26	28
V272	26	28
V273	26	28
V274	26	28
V275	26	28
V276	26	28
V277	26	28
V278	26	28
V279	26	28
V280	26	28
V281	26	28
V282	26	28
V283	25	28
V284	25	28
V285	25	28
V286	25	28
V287	25	28
V288	25	28
V289	25	28
V290	25	28
V291	25	28
V292	25	28
V293	25	28
V294	25	28
V295	25	28
V296	25	28
V297	25	28
V298	25	28
V299	25	28
V300	25	28
V301	25	28
V302	25	28
V303	25	28
V304	25	28
V305	25	28
V306	25	28
V307	25	28
V308	25	28
V309	25	28
V310	25	28
V311	25	28
V312	25	28
V313	25	28
V314	25	28
V315	25	28
V316	25	28
V317	25	28
V318	25	28
V319	25	28
V320	25	28
V321	25	28
V322	25	28
V323	25	28
V324	25	28
V325	25	28
V326	25	28
V327	25	28
V328	25	28
V329	25	28
V330	25	28
V331	25	28
V332	25	28
V333	25	28
V334	25	28
V335	25	28
V336	25	28
V337	25	28
V338	25	28
V339	25	28
V340	25	28
V341	25	28
V342	25	28
V343	25	28
V344	25	28
V345	25	28
V346	25	28
V347	25	28
V348	25	28
V349	25	28
V350	25	28
V351	25	28
V352	25	28
V353	25	28
V354	25	28
V355	25	28
V356	25	28
V357	25	28
V358	25	28
V359	25	28
V360	25	28
V361	25	28
V362	25	28
V363	25	28
V364	25	28
V365	25	28
V366	25	28
V367	25	28
V368	25	28
V369	25	28
V370	25	28
V371	25	28
V372	25	28
V373	25	28
V374	25	28
V375	25	28
V376	25	28
V377	25	28
V378	25	28
V379	25	28
V380	25	28
V381	25	28
V382	25	28
V383	25	28
V384	25	28
V385	25	28
V386	25	28
V387	25	28
V388	25	28
V389	25	28
V390	25	28
V391	25	28
V392	25	28
V393	5	26
V394	5	26
V395	5	26
V396	5	26
V397	5	26
V398	5	26
V399	5	26
V400	5	26
V401	5	26
V402	5	26
V403	5	26
V404	5	26
V405	5	26
V406	5	26
V407	5	26
V408	5	26
V409	5	26
V410	5	26
V411	5	26
V412	5	26
V413	5	26
V414	5	26
V415	5	26
V416	5	26
V417	5	26
V418	5	26
V419	5	26
V420	5	26
V421	5	26
V422	5	26
V423	5	26
V424	5	26
V425	5	26
V426	5	26
V427	5	26
V428	5	26
V429	5	26
V430	5	26
V431	5	26
V432	5	26
V433	5	26
V434	5	26
V435	5	26
V436	5	26
V437	5	26
V438	5	26
V439	5	26
V440	5	26
V441	5	26
V442	5	26
V443	5	26
V444	5	26
V445	5	26
V446	5	26
V447	5	26
V448	5	26
V449	5	26
V450	5	26
V451	5	26
V452	5	26
V453	5	26
V454	5	26
V455	5	26
V456	5	26
V457	5	26
V458	5	26
V459	5	26
V460	5	26
V461	5	26
V462	5	26
V463	5	26
V464	5	26
V465	5	26
V466	5	26
V467	5	26
V468	5	26
V469	5	26
V470	5	26
V471	5	26
V472	5	26
V473	5	26
V474	5	26
V475	5	26
V476	5	26
V477	5	26
V478	5	26
V479	5	26
V480	5	26
V481	5	26
V482	5	26
V483	5	26
V484	5	26
V485	5	26
V486	5	26
V487	5	26
V488	5	26
V489	5	26
V490	5	26
V491	5	26
V492	5	26
V493	5	26
V494	5	26
V495	5	26
V496	5	26
V497	5	26
V498	5	26
V499	5	26
V500	5	26
V501	5	26
V502	5	26
V503	5	26
V504	5	26
V505	5	26
V506	5	26
V507	5	26
V508	5	26
V509	5	26
V510	5	26
V511	5	26
V512	5	26
V513	5	26
V514	5	26
V515	5	26
V516	5	26
V517	5	26
V518	5	26
V519	5	26
V520	5	26
V521	5	26
V522	5	26
V523	5	26
V524	5	26
V525	5	26
V526	5	26
V527	5	26
V528	5	26
V529	5	26
V530	5	26
V531	5	26
V532	5	26
V533	5	26
V534	5	26
V535	5	26
V536	5	26
V537	5	26
V538	5	26
V539	5	26
V540	5	26
V541	5	26
V542	5	26
V543	5	26
V544	5	26
V545	5	26
V546	5	26
V547	5	26
V548	5	26
V549	5	26
V550	5	26
V551	5	26
V552	5	26
V553	5	26
V554	5	26
V555	5	26
V556	5	26
V557	5	26
V558	5	26
V559	5	26
V560	25	26
V561	25	26
V562	25	26
V563	25	26
V564	25	26
V565	25	26
V566	25	26
V567	25	26
V568	25	26
V569	25	26
V570	25	26
V571	25	26
V572	25	26
V573	25	26
V574	25	26
V575	25	26
V576	25	26
V577	25	26
V578	25	26
V579	25	26
V580	25	26
V581	25	26
V582	26	25
V583	26	25
V584	26	25
V585	26	25
V586	26	25
V587	26	25
V588	26	25
V589	26	25
V590	25	26
V591	25	26
V592	25	26
V593	25	26
V594	25	26
V595	25	26
V596	25	26
V597	25	26
V598	25	26
V599	25	26
V600	25	26
V601	25	26
V602	25	26
V603	25	26
V604	25	26
V605	25	26
V606	25	26
V607	25	26
V608	25	26
V609	25	26
V610	25	26
V611	25	26
V612	25	26
V613	25	26
V614	25	26
V615	25	26
V616	25	26
V617	25	26
V618	25	26
V619	25	26
V620	25	26
V621	25	26
V622	25	26
V623	25	26
V624	25	26
V625	25	26
V626	25	26
V627	25	26
V628	25	26
V629	25	26
V630	25	26
V631	25	26
V632	25	26
V633	25	26
V634	25	26
V635	25	26
V636	25	26
V637	25	26
V638	25	26
V639	25	26
V640	25	26
V641	25	26
V642	25	26
V643	25	26
V644	25	26
V645	25	26
V646	25	26
V647	25	26
V648	25	26
V649	25	26
V650	25	26
V651	25	26
V652	25	26
V653	25	26
V654	25	26
V655	25	26
V656	25	26
V657	25	26
V658	25	26
V659	25	26
V660	25	26
V661	25	26
V662	25	26
V663	25	26
V664	25	26
V665	25	26
V666	25	26
V667	25	26
V668	25	26
V669	25	26
V670	25	26
V671	25	26
V672	25	26
V673	25	26
V674	25	26
V675	25	26
V676	25	26
V677	25	26
V678	25	26
V679	25	26
V680	25	26
V681	25	26
V682	25	26
V683	25	26
V684	25	26
V685	25	26
V686	25	26
V687	25	26
V688	25	26
V689	25	26
V690	25	26
V691	25	26
V692	25	26
V693	25	26
V694	25	26
V695	25	26
V696	25	26
V697	25	26
V698	25	26
V699	25	26
V700	25	26
V701	25	26
V702	25	26
V703	25	26
V704	25	26
V705	25	26
V706	25	26
V707	25	26
V708	25	26
V709	25	26
V710	25	26
V711	25	26
V712	25	26
V713	25	26
V714	25	26
V715	25	26
V716	25	26
V717	25	26
V718	25	26
V719	25	26
V720	25	26
V721	25	26
V722	25	26
V723	25	26
V724	25	26
V725	25	26
V726	25	26
V727	25	26
V728	25	26
V729	25	26
V730	25	26
V731	25	26
V732	25	26
V733	25	26
V734	25	26
V735	25	26
V736	25	26
V737	25	26
V738	25	26
V739	25	26
V740	25	26
V741	25	26
V742	25	26
V743	25	26
V744	25	26
V745	25	26
V746	25	26
V747	25	26
V748	25	26
V749	25	26
V750	25	26
V751	25	26
V752	25	26
V753	25	26
V754	25	26
V755	25	26
V756	25	26
V757	25	26
V758	25	26
V759	25	26
V760	25	26
V761	25	26
V762	25	26
V763	25	26
V764	25	26
V765	25	26
V766	25	26
V767	25	26
V768	25	26
V769	25	26
V770	25	26
V771	25	26
V772	25	26
V773	25	26
V774	25	26
V775	25	26
V776	25	26
V777	25	26
V778	25	26
V779	25	26
V780	25	26
V781	25	26
V782	25	26
V783	25	26
V784	25	26
V785	25	26
V786	25	26
V787	25	26
V788	25	26
V789	25	26
V790	25	26
V791	25	26
V792	25	26
V793	25	26
V794	25	26
V795	25	26
V796	25	26
V797	25	26
V798	25	26
V799	25	26
V800	25	26
V801	25	26
V802	10	26
V803	10	26
V804	10	26
V805	10	26
V806	10	26
V807	10	26
V808	10	26
V809	10	26
V810	10	26
V811	10	26
V812	10	26
V813	10	26
V814	10	26
V815	10	26
V816	10	26
V817	10	26
V818	10	26
V819	10	26
V820	10	26
V821	10	26
V822	10	26
V823	10	26
V824	10	26
V825	10	26
V826	10	26
V827	10	26
V828	10	26
V829	10	26
V830	10	26
V831	10	26
V832	10	26
V833	10	26
V834	10	26
V835	10	26
V836	10	26
V837	10	26
V838	10	26
V839	10	26
V840	10	26
V841	10	26
V842	10	26
V843	10	26
V844	10	26
V845	10	26
V846	10	26
V847	10	26
V848	10	26
V849	10	26
V850	10	26
V851	10	26
V852	10	26
V853	10	26
V854	10	26
V855	10	26
V856	10	26
V857	10	26
V858	10	26
V859	10	26
V860	10	26
V861	10	26
V862	10	26
V863	10	26
V864	10	26
V865	10	26
V866	10	26
V867	10	26
V868	10	26
V871	29	0
V872	3	11
V873	18	5
V874	18	5
V875	18	5
V876	18	5
V877	18	5
V878	18	5
V879	18	5
V880	18	5
V881	18	5
V882	18	5
V883	18	5
V884	20	13
V885	14	0
V887	5	0
V888	5	0
V889	5	0
V890	5	0
V891	12	22
V892	12	22
V893	12	22
V894	12	22
V895	12	22
V896	12	22
V897	12	22
V898	12	22
V899	12	22
V900	12	22
V901	12	22
V902	12	22
V903	12	22
V904	12	22
V905	12	22
V906	12	22
V907	12	22
V908	12	22
V909	12	22
V910	12	22
V911	12	22
V912	12	22
V913	12	22
V914	12	22
V915	12	22
V916	12	22
V917	12	22
V918	12	22
V919	12	22
V920	12	22
V921	12	22
V922	12	22
V923	12	22
V924	12	22
V925	12	22
V926	12	22
V927	12	22
V928	12	22
V929	12	22
V930	12	22
V931	12	22
V932	12	22
V933	12	22
V934	12	22
V935	12	22
V936	12	22
V937	12	22
V938	12	22
V939	12	22
V940	12	22
V941	12	22
V942	12	22
V943	12	22
V944	12	22
V945	12	22
V946	12	22
V947	12	22
V948	12	22
V949	12	22
V950	12	22
V951	12	22
V952	12	22
V953	12	22
V954	12	22
V955	12	22
V956	12	22
V957	12	22
V958	12	22
V959	12	22
V960	12	22
V961	12	22
V962	12	22
V963	12	22
V964	12	22
V965	12	22
V966	12	22
V967	12	22
V968	12	22
V969	12	22
V970	12	22
V971	12	22
V972	12	22
V973	12	22
V974	12	22
V975	12	22
V976	12	22
V977	12	22
V978	12	22
V979	12	22
V980	12	22
V981	12	22
V982	12	22
V983	12	22
V984	12	22
V985	12	22
V986	12	22
V987	12	22
V988	12	22
V989	12	22
V990	12	22
V991	12	22
V992	12	22
V993	12	22
V994	12	22
V995	12	22
V996	12	22
V997	12	22
V998	12	22
V999	12	22
V1000	12	22
V1001	12	22
V1002	12	22
V1003	12	22
V1004	12	22
V1005	12	8
V1006	12	8
V1007	12	8
V1008	12	8
V1009	12	8
V1010	12	8
V1011	12	8
V1012	12	8
V1013	12	8
V1014	12	8
V1015	12	8
V1016	12	8
V1017	12	8
V1018	12	8
V1019	12	8
V1020	12	8
V1021	12	8
V1022	12	8
V1023	12	8
V1024	12	8
V1025	12	8
V1026	12	8
V1027	12	8
V1028	12	8
V1029	12	8
V1030	12	8
V1031	12	8
V1032	12	8
V1033	12	8
V1034	12	8
V1035	12	8
V1036	12	8
V1037	12	8
V1038	12	8
V1039	12	8
V1040	12	8
V1041	12	8
V1042	12	8
V1043	12	8
V1044	12	8
V1045	12	8
V1046	12	8
V1047	12	8
V1048	12	8
V1049	12	8
V1050	12	8
V1051	12	8
V1052	12	8
V1053	12	8
V1054	12	8
V1055	12	8
V1056	12	8
V1057	12	8
V1058	12	8
V1059	12	8
V1060	12	8
V1061	12	8
V1062	12	8
V1063	12	8
V1064	12	8
V1065	12	8
V1066	12	8
V1067	12	8
V1068	12	8
V1069	12	8
V1070	12	8
V1071	12	8
V1072	12	8
V1073	12	8
V1074	12	8
V1075	12	8
V1076	12	8
V1077	12	8
V1078	12	8
V1079	12	8
V1080	12	8
V1081	12	8
V1082	12	8
V1083	12	8
V1084	12	8
V1085	12	8
V1086	12	8
V1087	12	8
V1088	12	8
V1089	12	8
V1090	12	8
V1091	12	8
V1092	12	8
V1093	12	8
V1094	12	8
V1095	12	8
V1096	12	8
V1097	12	8
V1098	12	8
V1099	12	8
V1100	12	8
V1101	12	8
V1102	12	8
V1103	12	8
V1104	12	8
V1105	12	8
V1106	12	8
V1107	12	8
V1108	12	8
V1109	5	17
V1110	5	17
V1111	5	17
V1112	5	17
V1113	5	17
V1114	5	17
V1115	5	17
V1116	5	17
V1117	5	17
V1118	5	17
V1119	5	17
V1120	5	17
V1121	5	17
V1122	5	17
V1123	5	17
V1124	5	17
V1125	5	17
V1126	5	17
V1127	5	17
V1128	5	17
V1129	5	17
V1130	5	17
V1131	5	17
V1132	5	17
V1133	5	17
V1134	5	17
V1135	5	17
V1136	5	17
V1137	5	17
V1138	5	17
V1139	5	17
V1140	5	17
V1141	5	17
V1142	5	17
V1143	5	17
V1144	5	17
V1145	5	17
V1146	5	17
V1147	5	17
V1148	5	17
V1149	5	17
V1150	5	17
V1151	5	17
V1152	5	17
V1153	5	17
V1154	5	17
V1155	5	17
V1156	5	17
V1157	5	17
V1158	5	17
V1159	5	17
V1160	5	17
V1161	5	17
V1162	5	17
V1163	5	17
V1164	5	17
V1165	5	17
V1166	5	17
V1167	5	17
V1168	5	17
V1169	5	17
V1170	5	17
V1171	5	17
V1172	5	17
V1173	5	17
V1174	5	17
V1175	5	17
V1176	5	17
V1177	5	17
V1178	5	17
V1179	5	17
V1180	5	17
V1181	5	17
V1182	5	17
V1183	5	17
V1184	5	17
V1185	5	17
V1186	5	17
V1187	5	17
V1188	5	17
V1189	5	17
V1190	5	17
V1191	5	17
V1192	5	17
V1193	5	17
V1194	5	17
V1195	5	17
V1196	5	17
V1197	5	17
V1198	5	17
V1199	5	17
V1200	5	17
V1201	5	17
V1202	5	17
V1203	5	17
V1204	5	17
V1205	5	17
V1206	5	17
V1207	5	17
V1208	5	17
V1209	5	17
V1210	5	17
V1211	5	17
V1212	5	17
V1213	5	17
V1214	5	17
V1215	5	17
V1216	5	17
V1217	5	17
V1218	5	17
V1219	5	17
V1220	5	17
V1221	5	17
V1222	5	17
V1223	5	17
V1224	5	17
V1225	5	17
V1226	5	17
V1227	21	5
V1228	21	5
V1229	21	5
V1230	21	5
V1231	21	5
V1232	21	5
V1233	21	5
V1234	21	5
V1235	21	5
V1236	21	5
V1237	21	5
V1238	21	5
V1239	21	5
V1240	21	5
V1241	21	5
V1242	21	5
V1243	21	5
V1244	21	5
V1245	21	5
V1246	21	5
V1247	21	5
V1248	21	5
V1249	21	5
V1250	21	5
V1251	21	5
V1252	21	5
V1253	21	5
V1254	21	5
V1255	21	5
V1256	21	5
V1257	21	5
V1258	21	5
V1259	21	5
V1260	21	5
V1261	21	5
V1262	21	5
V1263	21	5
V1264	21	5
V1265	21	5
V1266	21	5
V1267	21	5
V1268	9	22
V1269	9	22
V1270	9	22
V1271	9	22
V1272	9	22
V1273	9	22
V1274	9	22
V1275	9	22
V1276	9	22
V1277	9	22
V1278	9	22
V1279	9	22
V1280	9	22
V1281	9	22
V1282	9	22
V1283	9	22
V1284	9	22
V1285	9	22
V1286	9	22
V1287	9	22
V1288	9	22
V1289	9	22
V1290	9	22
V1291	9	22
V1292	9	22
V1293	9	22
V1294	9	22
V1295	9	22
V1296	9	22
V1297	9	22
V1298	9	22
V1299	9	22
V1300	9	22
V1301	9	22
V1302	9	22
V1303	9	22
V1304	9	22
V1305	9	22
V1306	9	22
V1307	9	22
V1308	9	22
V1309	9	22
V1310	9	22
V1311	9	22
V1312	9	22
V1313	9	22
V1314	9	22
V1315	9	22
V1316	9	22
V1317	9	22
V1318	18	5
V1319	18	5
V1320	18	5
V1321	18	5
V1322	18	5
V1323	18	5
V1324	18	5
V1325	18	5
V1326	18	5
V1327	18	5
V1328	18	5
V1329	18	5
V1330	18	5
V1331	18	5
V1332	18	5
V1333	18	5
V1334	18	5
V1335	18	5
V1336	18	5
V1337	18	5
V1338	18	5
V1339	18	5
V1340	18	5
V1341	18	5
V1342	18	5
V1343	18	5
V1344	18	5
V1345	18	5
V1346	18	5
V1347	18	5
V1348	18	5
V1349	18	5
V1350	18	5
V1351	18	5
V1352	18	5
V1353	18	5
V1354	18	5
V1355	18	5
V1356	18	5
V1357	18	5
V1358	18	5
V1359	18	5
V1360	18	5
V1361	18	5
V1362	18	5
V1363	18	5
V1364	18	5
V1365	18	5
V1366	18	5
V1367	18	5
V1368	18	5
V1369	18	5
V1370	18	5
V1371	18	5
V1372	18	5
V1373	18	5
V1374	18	5
V1375	18	5
V1376	18	5
V1377	18	5
V1378	18	5
V1379	18	5
V1380	18	5
V1381	18	5
V1382	18	5
V1383	18	5
V1384	18	5
V1385	18	5
V1386	18	5
V1387	18	5
V1388	18	5
V1389	18	5
V1390	18	5
V1391	18	5
V1392	18	5
V1393	18	5
V1394	18	5
V1395	18	5
V1396	18	5
V1397	18	5
V1398	18	5
V1399	18	5
V1400	18	5
V1401	18	5
V1402	18	5
V1403	18	5
V1404	18	5
V1405	18	5
V1406	18	5
V1407	18	5
V1408	18	5
V1409	18	5
V1410	18	5
V1411	18	5
V1412	18	5
V1413	18	5
V1414	18	5
V1415	18	5
V1416	18	5
V1417	18	5
V1418	18	5
V1419	18	5
V1420	18	5
V1421	18	5
V1422	18	5
V1423	18	5
V1424	18	5
V1425	18	5
V1426	18	5
V1427	18	5
V1428	18	5
V1429	18	5
V1430	18	5
V1431	18	5
V1432	18	5
V1433	18	5
V1434	18	5
V1435	18	5
V1436	18	5
V1437	18	5
V1438	18	5
V1439	18	5
V1440	18	5
V1441	18	5
V1442	18	5
V1443	18	5
V1444	18	5
V1445	18	5
V1446	18	5
V1447	18	5
V1448	18	5
V1449	18	5
V1450	18	5
V1451	18	5
V1452	18	5
V1453	18	5
V1454	18	5
V1455	18	5
V1456	18	5
V1457	18	5
V1458	18	5
V1459	18	5
V1460	18	5
V1461	18	5
V1462	18	5
V1463	18	5
V1464	18	5
V1465	18	5
V1466	18	5
V1467	18	5
V1468	18	5
V1469	18	5
V1470	18	5
V1471	18	5
V1472	18	5
V1473	18	5
V1474	18	5
V1475	18	5
V1476	18	5
V1477	18	5
V1478	18	5
V1479	18	5
V1480	18	5
V1481	18	5
V1482	18	5
V1483	18	5
V1484	18	5
V1485	18	5
V1486	18	5
V1487	18	5
V1488	18	5
V1489	18	5
V1490	18	5
V1491	18	5
V1492	18	5
V1493	18	5
V1494	18	5
V1495	18	5
V1496	18	5
V1497	18	5
V1498	18	5
V1499	14	5
V1500	14	5
V1501	14	5
V1502	14	5
V1503	14	5
V1504	14	5
V1505	14	5
V1506	14	5
V1507	14	5
V1508	14	5
V1509	14	5
V1510	14	5
V1511	14	5
V1512	14	5
V1513	14	5
V1514	5	14
V1515	5	14
V1516	5	14
V1517	5	14
V1518	5	14
V1519	5	14
V1520	5	14
V1521	5	14
V1522	5	14
V1523	5	14
V1524	5	14
V1525	5	14
V1526	5	14
V1527	5	14
V1528	5	14
V1529	5	14
V1530	5	14
V1531	5	14
V1532	5	14
V1533	5	14
V1534	5	14
V1535	5	14
V1536	5	14
V1537	5	14
V1538	5	14
V1539	5	14
V1540	5	14
V1541	5	14
V1542	5	14
V1543	5	14
V1544	5	14
V1545	5	14
V1546	5	14
V1547	5	14
V1548	5	14
V1549	5	14
V1550	5	14
V1551	5	14
V1552	5	14
V1553	5	14
V1554	5	14
V1555	5	14
V1556	5	14
V1557	5	14
V1558	5	14
V1559	5	14
V1560	5	14
V1561	5	14
V1562	5	14
V1563	5	14
V1564	5	14
V1565	5	14
V1566	5	14
V1567	5	14
V1568	5	14
V1569	5	14
V1570	5	14
V1571	5	14
V1572	5	14
V1573	5	14
V1574	5	14
V1575	5	14
V1576	5	14
V1577	5	14
V1578	5	14
V1579	5	14
V1580	5	14
V1581	5	14
V1582	5	14
V1583	5	14
V1584	5	14
V1585	5	14
V1586	5	14
V1587	5	14
V1588	5	14
V1589	5	14
V1590	5	14
V1591	5	14
V1592	5	14
V1593	5	14
V1594	5	14
V1595	5	14
V1596	5	14
V1597	5	14
V1598	5	14
V1599	5	14
V1600	5	14
V1601	5	14
V1602	5	14
V1603	5	14
V1604	5	14
V1605	5	14
V1606	5	14
V1607	5	14
V1608	5	14
V1609	5	14
V1610	5	14
V1611	5	14
V1612	5	14
V1613	5	14
V1614	5	14
V1615	5	14
V1616	5	14
V1617	5	14
V1618	5	14
V1619	5	14
V1620	5	14
V1621	5	14
V1622	5	14
V1623	5	14
V1624	5	14
V1625	5	14
V1626	5	14
V1627	5	14
V1628	5	14
V1629	5	14
V1630	5	14
V1631	5	14
V1632	5	14
V1633	5	14
V1634	5	14
V1635	5	14
V1636	5	14
V1637	5	14
V1638	5	14
V1639	5	14
V1640	5	14
V1641	5	14
V1642	5	14
V1643	5	14
V1644	5	14
V1645	5	14
V1646	5	14
V1647	5	14
V1648	5	14
V1649	5	14
V1650	5	14
V1651	5	14
V1652	5	14
V1653	5	14
V1654	5	14
V1655	5	14
V1656	5	14
V1657	5	14
V1658	5	14
V1659	5	14
V1660	5	14
V1661	5	14
V1662	5	14
V1663	5	14
V1664	5	14
V1665	5	14
V1666	4	5
V1667	4	5
V1668	4	5
V1669	4	5
V1670	4	5
V1671	4	5
V1672	4	5
V1673	4	5
V1674	4	5
V1675	4	5
V1676	4	5
V1677	4	5
V1678	4	5
V1679	4	5
V1680	4	5
V1681	4	5
V1682	4	5
V1683	4	5
V1684	4	5
V1685	4	5
V1686	4	5
V1687	4	5
V1688	4	5
V1689	4	5
V1690	4	5
V1691	4	5
V1692	4	5
V1693	4	5
V1694	4	5
V1695	4	5
V1696	4	5
V1697	4	5
V1698	4	5
V1699	4	5
V1700	4	5
V1701	4	5
V1702	4	5
V1703	4	5
V1704	4	5
V1705	4	5
V1706	4	5
V1707	4	5
V1708	4	5
V1709	4	5
V1710	4	5
V1711	4	5
V1712	4	5
V1713	4	5
V1714	4	5
V1715	4	5
V1716	4	5
V1717	4	5
V1718	4	5
V1719	4	5
V1720	4	5
V1721	4	5
V1722	4	5
V1723	4	5
V1724	4	5
V1725	4	5
V1726	12	7
V1727	12	7
V1728	12	7
V1729	12	7
V1730	12	7
V1731	12	7
V1732	12	7
V1733	12	7
V1734	12	7
V1735	12	7
V1736	12	7
V1737	12	7
V1738	12	7
V1739	12	7
V1740	12	7
V1741	12	7
V1742	12	7
V1743	12	7
V1744	12	7
V1745	12	7
V1746	12	7
V1756	5	15
V1759	5	12
V1760	5	0
V1761	21	22
V1762	5	12
V1763	5	20
V1764	5	17
V1765	14	0
V1766	5	17
V1767	14	0
V1768	5	17
V1769	27	0
V1770	5	17
V1771	5	17
V1772	14	0
V1773	14	0
V1774	5	20
V1775	5	20
V1776	5	12
V1777	12	22
V1778	21	22
V1779	21	22
V1780	21	22
V1781	21	22
V1782	21	6
V1783	21	22
V1784	21	22
V1785	21	5
V1786	21	22
V1787	21	22
V1788	21	22
V1789	21	22
V1790	21	22
V1791	21	22
V1792	22	6
V1793	21	22
V1794	21	22
V1795	21	22
V1796	21	22
V1797	21	22
V1798	22	0
V1799	22	0
V1800	21	5
V1801	12	0
V1802	21	22
V1803	12	5
V1804	12	0
V1805	12	0
V1806	12	5
V1807	21	22
V1808	21	22
V1809	21	22
V1810	21	5
V1811	21	5
V1812	21	22
V1813	21	22
V1814	21	22
V1815	22	0
V1816	21	22
V1817	12	5
V1818	21	22
V1819	21	22
V1820	21	22
V1821	21	22
V1822	12	5
V1823	12	5
V1824	18	5
V1825	18	5
V1826	18	5
V1827	18	5
V1828	18	5
V1829	18	5
V1830	18	5
V1831	18	5
V1832	18	5
V1833	18	5
V1834	18	5
V1835	18	5
V1836	18	5
V1837	18	5
V1838	12	5
V1839	18	5
V1840	22	0
V1841	22	5
V1842	18	5
V1843	19	2
V1844	5	17
V1845	5	17
